# Supplementary material
Source: publisher figshare collection journal article supplement (https://gsajournals.figshare.com/ndownloader/files/28547712)
Supplement: Supplementary file 1 [file 28547712]

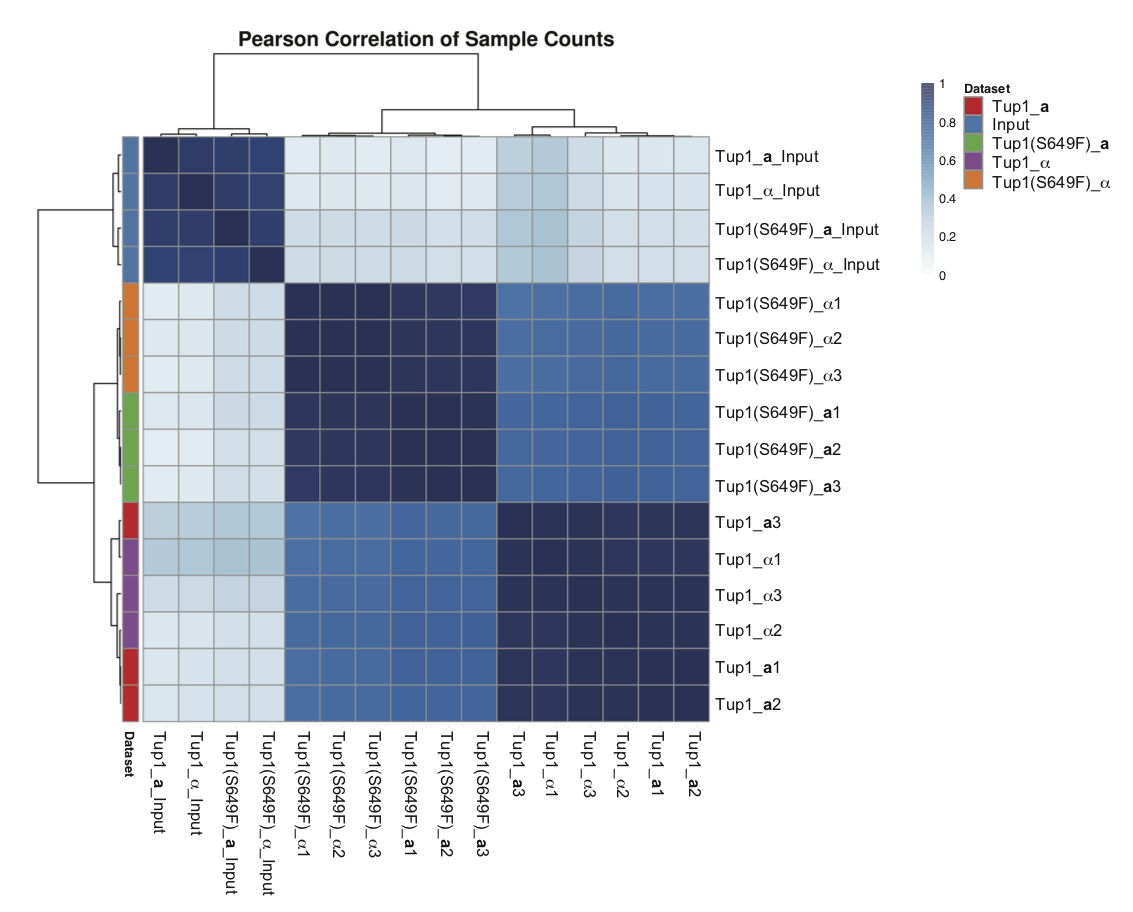


Figure S2. Pearson correlation plot for ChIP-Seq of Tup1-V5 and Tup1(S649F)-V5 in a and  strains.

Shown is a genome-wide Pearson correlation plot, using ChIP-Seq fragment counts in bins of 1 kb. Each strain is represented by triplicate ChIP samples and a single Input sample. Hierarchical clustering displays the relationships between samples; color coding for clustering of ChIP and Input samples is shown at the right.
